# Supplementary material
Source: PubMed Central journal article supplement (PMC7138663)
Supplement: nqaa028_supplemental_file.pdf [file nqaa028_supplemental_file.pdf]

Online supplementary material: Diet quality and risk of frailty among older women in the Nurses' Health Study

Struijk et al. Diet quality and risk of frailty among older women in the Nurses' Health Study

Online supplementary material

## **Table of contents**

Supplemental methods. Components and scoring of the dietary quality scores

Supplemental table 1. Components and scoring of the aMED, DASH, and aHEI-2010 diet quality scores.

Supplemental table 2. Relative risks (95% confidence interval) of frailty according to quartiles of the diet quality scores among women  $\geq 60$ y who were robust (0 frailty criteria) at baseline in the Nurses' Health Study.

Supplemental table 3. Relative risks (95% confidence interval) of frailty according to components of the aMED score among women  $\geq 60$ y in the Nurses' Health Study.

Supplemental table 4. Relative risks (95% confidence interval) of frailty according to components of the DASH score among women  $\geq 60$ y in the Nurses' Health Study.

Supplemental table 5. Relative risks (95% confidence interval) of frailty according to components of the alternate aHEI-2010 score among women  $\geq 60$ y in the Nurses' Health Study.

Supplemental table 6. Relative risks (95% confidence interval) of frailty according to quartiles of the diet quality scores without the alcohol component among women  $\geq 60$ y in the Nurses' Health Study.

Supplemental table 7. Relative risks (95% confidence interval) of frailty according to quartiles of the aMED score among women  $\geq 60$ y in the Nurses' Health Study; lagged analysis.

Supplemental table 8. Relative risks (95% confidence interval) of frailty according to quartiles of the DASH score among women  $\geq 60$ y in the Nurses' Health Study; lagged analysis.

Supplemental table 9. Relative risks (95% confidence interval) of frailty according to quartiles of the aHEI-2010 score among women  $\geq 60$ y in the Nurses' Health Study; lagged analysis.

Supplemental table 10. Relative risks (95% confidence interval) of frailty according to quartiles of the diet quality scores among a women  $\geq 60$ y without diabetes, heart disease or cancer in the Nurses' Health Study.

Supplemental figure 1. Participant flow chart

## Supplemental methods: Components and scoring of the dietary quality scores

The adherence to three diet quality scores were calculated the alternate Mediterranean diet (aMED), the Dietary Approaches to Stop Hypertension (DASH) diet and the alternate Healthy Eating Index-2010 (AHEI-2010) (**Supplemental table 1**). The aMED score measured adherence to a Mediterranean-style diet [1]. This score rewarded 1 point if the intake was above the cohort-specific median for vegetables, fruit, nuts, whole-grains, legumes, fish, and monounsaturated/saturated fat ratio and 1 point for intakes below the cohort-specific median for red and processed meats. Alcohol intake between 5 and 15 g/d received 1 point. Therefore, a higher score corresponds to a higher adherence to the Mediterranean diet, with a final range from 0 to 9 (highest adherence) points. The DASH score was based on food and nutrients emphasized in the DASH diet [2]. In this score, 1 to 5 points were assigned based on quintiles of intake in servings per day of fruits, vegetables, nuts and legumes, low-fat dairy products, and whole grains. Scoring was inverse for sodium, sugar-sweetened beverages and red and processed meat, with more points for lower consumption. The total score ranged from 8 to 40 (highest adherence) points. The AHEI-2010 was based on a comprehensive review of foods and nutrients that had consistently been associated with lower risk of chronic disease in clinical and epidemiologic investigations [3]. The score emphasized higher intake of vegetables, fruit, whole grains, nuts and legumes, long-chain n-3 fats, polyunsaturated fatty acids (PUFAs), and lower intake of sugar-sweetened beverages and fruit juices, red and processed meat, *trans* fat, sodium and alcohol. All components were scored from 0 to 10, and the total score ranged from 0 to 110 points (highest adherence). To best represent long-term diet during follow-up and to account for changes in food consumption, we used the cumulative average of the diet quality scores from all available dietary questionnaires from baseline through frailty onset or the end of follow-up.

## References

1. Fung TT, Hu FB, McCullough ML, Newby PK, Willett WC, Holmes ME. Diet quality is associated with the risk of estrogen receptor-negative breast cancer in postmenopausal women. *J Nutr* 2006;136:466-472.
2. Fung TT, Chiuve SE, McCullough ML, Rexrode KM, Logroscino G, Hu FB. Adherence to a dash-style diet and risk of coronary heart disease and stroke in women. *Arch Intern Med* 2008;168:713-720.
3. Chiuve SE, Fung TT, Rimm EB, et al. Alternative dietary indices both strongly predict risk of chronic disease. *J Nutr* 2012;142:1009-1018.

**Supplemental table 1.** Components and scoring of the aMED, DASH, and AHEI-2010 diet quality scores.

| Component                                    | Minimum score                                | Maximum score                                      |
|----------------------------------------------|----------------------------------------------|----------------------------------------------------|
| aMED                                         | 0                                            | 1                                                  |
| 1. Vegetables                                | Below the median                             | Above the median                                   |
| 2. Fruits                                    | Below the median                             | Above the median                                   |
| 3. Nuts                                      | Below the median                             | Above the median                                   |
| 4. Whole grains                              | Below the median                             | Above the median                                   |
| 5. Legumes                                   | Below the median                             | Above the median                                   |
| 6. Fish                                      | Below the median                             | Above the median                                   |
| 7. Monounsaturated/saturated fat ratio       | Below the median                             | Above the median                                   |
| 8. Red and processed meats                   | Above the median                             | Below the median                                   |
| 9. Alcohol                                   | 5 > alcohol > 15 g/d                         | 5 ≤ alcohol ≤ 15 g/d                               |
| Total                                        | 0                                            | 9                                                  |
| DASH <sup>1</sup>                            | 1                                            | 5                                                  |
| 1. Fruits                                    | Quintile 1                                   | Quintile 5                                         |
| 2. Vegetables                                | Quintile 1                                   | Quintile 5                                         |
| 3. Nuts and legumes                          | Quintile 1                                   | Quintile 5                                         |
| 4. Low-fat dairy                             | Quintile 1                                   | Quintile 5                                         |
| 5. Whole grains                              | Quintile 1                                   | Quintile 5                                         |
| 6. Sodium                                    | Quintile 5                                   | Quintile 1                                         |
| 7. Sugar-sweetened beverages                 | Quintile 5                                   | Quintile 1                                         |
| 8. Red and processed meats                   | Quintile 5                                   | Quintile 1                                         |
| Total                                        | 8                                            | 40                                                 |
| AHEI-2010 <sup>1</sup>                       | 0                                            | 10                                                 |
| 1. Vegetables                                | 0 serving/d                                  | ≥5 servings/d                                      |
| 2. Fruit                                     | 0 serving/d                                  | ≥4 servings/d                                      |
| 3. Whole grains                              | 0 g/d                                        | ≥90 g/d (m)<br>≥75 g/d (w)                         |
| 4. Nuts and legumes                          | 0 serving/d                                  | ≥1 serving/d                                       |
| 5. Long-chain n-3 fats                       | 0 mg/d                                       | ≥250 mg/d                                          |
| 6. Polyunsaturated fatty acids               | ≤2 % energy/d                                | ≥10 % energy/d                                     |
| 7. Sugar-sweetened beverages and fruit juice | ≥1 serving/d                                 | 0 servings/d                                       |
| 8. Red and processed meats                   | ≥1.5 serving/d                               | 0 servings/d                                       |
| 9. <i>Trans</i> fat                          | ≥4 % energy/d                                | ≤0.5 % energy/d                                    |
| 10. Sodium                                   | Highest decile                               | Lowest decile                                      |
| 11. Alcohol                                  | ≥3.5 drinks/d (men)<br>≥2.5 drinks/d (women) | 0.5-2.0 drinks/d (men)<br>0.5-1.5 drinks/d (women) |
| Total                                        | 0                                            | 110                                                |

AHEI-2010, alternate Healthy Eating Index-2010; AMED, alternate Mediterranean diet; DASH, Dietary Approaches to Stop Hypertension

<sup>1</sup>Intakes between the minimum and maximum levels are scored proportionately.

**Supplemental table 2.** Relative risks (95% confidence interval) of frailty according to quartiles of the diet quality scores among women  $\geq 60$ y who were robust (0 frailty criteria) at baseline in the Nurses' Health Study.

|                                  | Q1        | Q2                | Q3                | Q4                | P for trend | RR (95%CI) for 1 SD increase in the diet score <sup>4</sup> |
|----------------------------------|-----------|-------------------|-------------------|-------------------|-------------|-------------------------------------------------------------|
| <b>aMED</b>                      |           |                   |                   |                   |             |                                                             |
| Participants, n                  | 13,191    | 16,646            | 12,887            | 15,040            |             | 57,764                                                      |
| Person-yr                        | 191,177   | 219,123           | 209,057           | 230,554           |             | 855,910                                                     |
| Frailty cases                    | 2336      | 2197              | 1866              | 1538              |             | 7937                                                        |
| Age-adjusted                     | Reference | 0.86 (0.81, 0.91) | 0.73 (0.68, 0.77) | 0.57 (0.53, 0.60) | <0.001      | 0.74 (0.72, 0.76)                                           |
| Multivariable model <sup>1</sup> | Reference | 0.87 (0.82, 0.92) | 0.75 (0.70, 0.79) | 0.59 (0.55, 0.63) | <0.001      | 0.76 (0.73, 0.78)                                           |
| Multivariable model <sup>2</sup> | Reference | 0.86 (0.81, 0.91) | 0.73 (0.68, 0.77) | 0.58 (0.54, 0.62) | <0.001      | 0.75 (0.72, 0.77)                                           |
| Multivariable model <sup>3</sup> | Reference | 0.96 (0.90, 1.02) | 0.89 (0.84, 0.95) | 0.81 (0.75, 0.87) | <0.001      | 0.89 (0.86, 0.92)                                           |
| <b>DASH</b>                      |           |                   |                   |                   |             |                                                             |
| Participants, n                  | 15,461    | 16,238            | 13,480            | 12,585            |             | 57,764                                                      |
| Person-yr                        | 199,865   | 222,959           | 212,465           | 220,622           |             | 855,910                                                     |
| Frailty cases                    | 2123      | 2090              | 1956              | 1768              |             | 7937                                                        |
| Age-adjusted                     | Reference | 0.82 (0.77, 0.87) | 0.73 (0.68, 0.77) | 0.59 (0.55, 0.62) | <0.001      | 0.81 (0.79, 0.83)                                           |
| Multivariable model <sup>1</sup> | Reference | 0.84 (0.79, 0.89) | 0.75 (0.71, 0.80) | 0.63 (0.59, 0.68) | <0.001      | 0.83 (0.81, 0.85)                                           |
| Multivariable model <sup>2</sup> | Reference | 0.83 (0.78, 0.88) | 0.73 (0.69, 0.78) | 0.61 (0.57, 0.65) | <0.001      | 0.82 (0.80, 0.84)                                           |
| Multivariable model <sup>3</sup> | Reference | 0.93 (0.87, 0.99) | 0.90 (0.85, 0.96) | 0.84 (0.79, 0.90) | <0.001      | 0.94 (0.91, 0.96)                                           |
| <b>AHEI-2010</b>                 |           |                   |                   |                   |             |                                                             |
| Participants, n                  | 14,784    | 14,425            | 14,389            | 14,166            |             | 57,764                                                      |
| Person-yr                        | 203,241   | 211,401           | 217,278           | 223,990           |             | 855,910                                                     |
| Frailty cases                    | 2338      | 2123              | 1938              | 1538              |             | 7937                                                        |
| Age-adjusted                     | Reference | 0.84 (0.79, 0.89) | 0.74 (0.70, 0.79) | 0.56 (0.53, 0.60) | <0.001      | 0.79 (0.77, 0.81)                                           |
| Multivariable model <sup>1</sup> | Reference | 0.84 (0.79, 0.89) | 0.75 (0.71, 0.80) | 0.60 (0.56, 0.64) | <0.001      | 0.81 (0.79, 0.83)                                           |
| Multivariable model <sup>2</sup> | Reference | 0.83 (0.78, 0.88) | 0.74 (0.70, 0.79) | 0.59 (0.56, 0.63) | <0.001      | 0.81 (0.79, 0.83)                                           |
| Multivariable model <sup>3</sup> | Reference | 0.92 (0.87, 0.98) | 0.89 (0.84, 0.95) | 0.80 (0.75, 0.86) | <0.001      | 0.92 (0.89, 0.94)                                           |

AHEI-2010, alternate Healthy Eating Index-2010; AMED, alternate Mediterranean diet; DASH, Dietary Approaches to Stop Hypertension

<sup>1</sup> Adjusted for: age (1 year increment), body mass index (<25.0, 25.0-29.9,  $\geq 30.0$  kg/m<sup>2</sup>), smoking status (never, past, and current 1-14, 15-24, and  $\geq 25$  cigarettes/day), and energy intake (quintiles of kcal/d). The DASH score is additionally adjusted for alcohol intake (0, 1.0-4.9, 5.0-14.9,  $\geq 15.0$  g/d).

<sup>2</sup> Additionally adjusted for medication use (aspirin, postmenopausal hormone replacement therapy, diuretics,  $\beta$ -blockers, calcium channel blockers, ACE inhibitors, other blood pressure medication, statins and other cholesterol lowering drugs, insulin, oral hypoglycemic medication).

<sup>3</sup> Additionally adjusted for leisure time physical activity (quintiles of METs h/wk).

<sup>4</sup> Standard deviations (SD) of the diet scores: aMED score SD was 2, DASH score SD was 4, AHEI-2010 score SD was 10.

**Supplemental table 3.** Relative risks (95% confidence interval) of frailty according to components of the aMED score among women  $\geq 60$ y in the Nurses' Health Study (n=71,941).

| aMED components                            | 0         | 1                 |
|--------------------------------------------|-----------|-------------------|
| <b>Vegetables</b>                          |           |                   |
| Multivariable model <sup>1</sup>           | Reference | 0.88 (0.84, 0.91) |
| Multivariable model <sup>2</sup>           | Reference | 0.97 (0.93, 1.02) |
| <b>Fruits</b>                              |           |                   |
| Multivariable model <sup>1</sup>           | Reference | 0.90 (0.86, 0.93) |
| Multivariable model <sup>2</sup>           | Reference | 0.97 (0.94, 1.02) |
| <b>Nuts</b>                                |           |                   |
| Multivariable model <sup>1</sup>           | Reference | 0.92 (0.88, 0.96) |
| Multivariable model <sup>2</sup>           | Reference | 0.96 (0.92, 0.99) |
| <b>Whole grains</b>                        |           |                   |
| Multivariable model <sup>1</sup>           | Reference | 0.90 (0.87, 0.94) |
| Multivariable model <sup>2</sup>           | Reference | 0.98 (0.94, 1.02) |
| <b>Legumes</b>                             |           |                   |
| Multivariable model <sup>1</sup>           | Reference | 1.03 (0.99, 1.07) |
| Multivariable model <sup>2</sup>           | Reference | 1.05 (1.00, 1.09) |
| <b>Fish</b>                                |           |                   |
| Multivariable model <sup>1</sup>           | Reference | 0.92 (0.88, 0.96) |
| Multivariable model <sup>2</sup>           | Reference | 0.97 (0.93, 1.01) |
| <b>Monounsaturated/saturated fat ratio</b> |           |                   |
| Multivariable model <sup>1</sup>           | Reference | 0.92 (0.88, 0.96) |
| Multivariable model <sup>2</sup>           | Reference | 0.95 (0.91, 0.99) |
| <b>Red and processed meats</b>             |           |                   |
| Multivariable model <sup>1</sup>           | Reference | 0.86 (0.83, 0.89) |
| Multivariable model <sup>2</sup>           | Reference | 0.92 (0.88, 0.95) |
| <b>Alcohol</b>                             |           |                   |
| Multivariable model <sup>1</sup>           | Reference | 0.76 (0.72, 0.80) |
| Multivariable model <sup>2</sup>           | Reference | 0.80 (0.76, 0.85) |

AMED, alternate Mediterranean diet

<sup>1</sup> Adjusted for: age (1 year increment), body mass index (<25.0, 25.0-29.9,  $\geq 30.0$  kg/m<sup>2</sup>), smoking status (never, past, and current 1-14, 15-24, and  $\geq 25$  cigarettes/day), energy intake (quintiles of kcal/d), and medication use (aspirin, postmenopausal hormone replacement therapy, diuretics,  $\beta$ -blockers, calcium channel blockers, ACE inhibitors, other blood pressure medication, statins and other cholesterol lowering drugs, insulin, oral hypoglycemic medication). All components are mutually adjusted for each other.

<sup>2</sup> Additionally adjusted for leisure time physical activity (quintiles of METs h/wk).

**Supplemental table 4.** Relative risks (95% confidence interval) of frailty according to components of the DASH score among women  $\geq 60$ y in the Nurses' Health Study (n=71,941).

| DASH components                  | Per 1 point increment <sup>3</sup> |
|----------------------------------|------------------------------------|
| <b>Fruits</b>                    |                                    |
| Multivariable model <sup>1</sup> | 0.94 (0.92, 0.96)                  |
| Multivariable model <sup>2</sup> | 0.98 (0.96, 1.00)                  |
| <b>Vegetables</b>                |                                    |
| Multivariable model <sup>1</sup> | 0.92 (0.90, 0.94)                  |
| Multivariable model <sup>2</sup> | 0.97 (0.95, 0.99)                  |
| <b>Nuts and legumes</b>          |                                    |
| Multivariable model <sup>1</sup> | 0.97 (0.95, 0.99)                  |
| Multivariable model <sup>2</sup> | 0.99 (0.97, 1.01)                  |
| <b>Low-fat dairy</b>             |                                    |
| Multivariable model <sup>1</sup> | 0.99 (0.97, 1.01)                  |
| Multivariable model <sup>2</sup> | 1.01 (0.99, 1.03)                  |
| <b>Whole grains</b>              |                                    |
| Multivariable model <sup>1</sup> | 0.92 (0.90, 0.94)                  |
| Multivariable model <sup>2</sup> | 0.96 (0.94, 0.98)                  |
| <b>Sodium</b>                    |                                    |
| Multivariable model <sup>1</sup> | 0.92 (0.90, 0.95)                  |
| Multivariable model <sup>2</sup> | 0.95 (0.92, 0.97)                  |
| <b>Sugar-sweetened beverages</b> |                                    |
| Multivariable model <sup>1</sup> | 1.02 (1.00, 1.04)                  |
| Multivariable model <sup>2</sup> | 1.03 (1.01, 1.05)                  |
| <b>Red and processed meats</b>   |                                    |
| Multivariable model <sup>1</sup> | 0.93 (0.91, 0.95)                  |
| Multivariable model <sup>2</sup> | 0.96 (0.94, 0.97)                  |

DASH, Dietary Approaches to Stop Hypertension

<sup>1</sup> Adjusted for: age (1 year increment), body mass index (<25.0, 25.0-29.9,  $\geq 30.0$  kg/m<sup>2</sup>), smoking status (never, past, and current 1-14, 15-24, and  $\geq 25$  cigarettes/day), energy intake (quintiles of kcal/d), alcohol intake (0, 1.0-4.9, 5.0-14.9,  $\geq 15.0$  g/d) and medication use (aspirin, postmenopausal hormone replacement therapy, diuretics,  $\beta$ -blockers, calcium channel blockers, ACE inhibitors, other blood pressure medication, statins and other cholesterol lowering drugs, insulin, oral hypoglycemic medication). All components are mutually adjusted for each other.

<sup>2</sup> Additionally adjusted for leisure time physical activity (quintiles of METs h/wk).

<sup>3</sup> An increase in points represents a lower intake for the unhealthy components sodium, sugar-sweetened beverages and red and processed meat.

**Supplemental table 5.** Relative risks (95% confidence interval) of frailty according to components of the alternate AHEI-2010 score among women  $\geq 60$ y in the Nurses' Health Study (n=71,941).

| AHEI-2010 components                             | Per 2 points increment <sup>3</sup> |
|--------------------------------------------------|-------------------------------------|
| <b>Vegetables</b>                                |                                     |
| Multivariable model <sup>1</sup>                 | 0.91 (0.89, 0.93)                   |
| Multivariable model <sup>2</sup>                 | 0.96 (0.93, 0.98)                   |
| <b>Fruits</b>                                    |                                     |
| Multivariable model <sup>1</sup>                 | 0.96 (0.94, 0.98)                   |
| Multivariable model <sup>2</sup>                 | 1.01 (0.98, 1.03)                   |
| <b>Whole grains</b>                              |                                     |
| Multivariable model <sup>1</sup>                 | 0.93 (0.91, 0.96)                   |
| Multivariable model <sup>2</sup>                 | 0.99 (0.96, 1.01)                   |
| <b>Nuts and legumes</b>                          |                                     |
| Multivariable model <sup>1</sup>                 | 0.95 (0.93, 0.96)                   |
| Multivariable model <sup>2</sup>                 | 0.98 (0.96, 1.00)                   |
| <b>Long chain n3 fats (EPA+DHA)</b>              |                                     |
| Multivariable model <sup>1</sup>                 | 0.97 (0.95, 0.98)                   |
| Multivariable model <sup>2</sup>                 | 0.99 (0.97, 1.01)                   |
| <b>Polyunsaturated fat</b>                       |                                     |
| Multivariable model <sup>1</sup>                 | 0.97 (0.94, 1.01)                   |
| Multivariable model <sup>2</sup>                 | 0.96 (0.93, 0.99)                   |
| <b>Sugar-sweetened beverages and fruit juice</b> |                                     |
| Multivariable model <sup>1</sup>                 | 1.02 (1.01, 1.04)                   |
| Multivariable model <sup>2</sup>                 | 1.02 (1.01, 1.03)                   |
| <b>Red and processed meats</b>                   |                                     |
| Multivariable model <sup>1</sup>                 | 0.98 (0.97, 1.00)                   |
| Multivariable model <sup>2</sup>                 | 0.99 (0.98, 1.01)                   |
| <b>Trans fat</b>                                 |                                     |
| Multivariable model <sup>1</sup>                 | 0.96 (0.91, 1.01)                   |
| Multivariable model <sup>2</sup>                 | 0.98 (0.93, 1.03)                   |
| <b>Sodium</b>                                    |                                     |
| Multivariable model <sup>1</sup>                 | 0.92 (0.90, 0.94)                   |
| Multivariable model <sup>2</sup>                 | 0.93 (0.91, 0.95)                   |
| <b>Alcohol</b>                                   |                                     |
| Multivariable model <sup>1</sup>                 | 0.87 (0.86, 0.89)                   |
| Multivariable model <sup>2</sup>                 | 0.90 (0.88, 0.91)                   |

AHEI-2010, alternate Healthy Eating Index-2010

<sup>1</sup> Adjusted for: age (1 year increment), body mass index (<25.0, 25.0-29.9,  $\geq 30.0$  kg/m<sup>2</sup>), smoking status (never, past, and current 1-14, 15-24, and  $\geq 25$  cigarettes/day), energy intake (quintiles of kcal/d) and medication use (aspirin, postmenopausal hormone replacement therapy, diuretics,  $\beta$ -blockers, calcium channel blockers, ACE inhibitors, other blood pressure medication, statins and other cholesterol lowering drugs, insulin, oral hypoglycemic medication). All components are mutually adjusted for each other.

<sup>2</sup> Additionally adjusted for leisure time physical activity (quintiles of METs h/wk).

<sup>3</sup> An increase in points represents a lower intake for the unhealthy components red and processed meat, sugar-sweetened beverages and fruit juice, *trans* fat, sodium and alcohol.

**Supplemental table 6.** Relative risks (95% confidence interval) of frailty according to quartiles of the diet quality scores without the alcohol component among women  $\geq 60$ y in the Nurses' Health Study.

|                                  | Q1        | Q2                | Q3                | Q4                | P for trend | RR (95%CI) for 1 SD increase in the diet score <sup>4</sup> |
|----------------------------------|-----------|-------------------|-------------------|-------------------|-------------|-------------------------------------------------------------|
| <b>aMED</b>                      |           |                   |                   |                   |             |                                                             |
| Participants, n                  | 18,783    | 20,624            | 15,959            | 16,575            |             | 71,941                                                      |
| Person-yr                        | 268,066   | 257,103           | 254,836           | 260,920           |             | 1,040,924                                                   |
| Frailty cases                    | 3746      | 2966              | 2628              | 2224              |             | 11,564                                                      |
| Age-adjusted                     | Reference | 0.86 (0.82, 0.90) | 0.73 (0.70, 0.77) | 0.58 (0.55, 0.61) | <0.001      | 0.75 (0.73, 0.76)                                           |
| Multivariable model <sup>1</sup> | Reference | 0.88 (0.84, 0.92) | 0.76 (0.72, 0.80) | 0.62 (0.59, 0.66) | <0.001      | 0.77 (0.75, 0.79)                                           |
| Multivariable model <sup>2</sup> | Reference | 0.86 (0.82, 0.90) | 0.73 (0.70, 0.77) | 0.60 (0.56, 0.63) | <0.001      | 0.75 (0.73, 0.77)                                           |
| Multivariable model <sup>3</sup> | Reference | 0.96 (0.91, 1.01) | 0.89 (0.85, 0.94) | 0.83 (0.78, 0.88) | <0.001      | 0.90 (0.87, 0.92)                                           |
| <b>AHEI-2010</b>                 |           |                   |                   |                   |             |                                                             |
| Participants, n                  | 19,579    | 18,204            | 17,553            | 16,605            |             | 71,941                                                      |
| Person-yr                        | 258,214   | 259,878           | 260,834           | 262,000           |             | 1,040,924                                                   |
| Frailty cases                    | 3455      | 3047              | 2750              | 2312              |             | 11,564                                                      |
| Age-adjusted                     | Reference | 0.84 (0.80, 0.88) | 0.74 (0.70, 0.77) | 0.60 (0.57, 0.63) | <0.001      | 0.80 (0.78, 0.82)                                           |
| Multivariable model <sup>1</sup> | Reference | 0.86 (0.81, 0.90) | 0.77 (0.73, 0.81) | 0.65 (0.62, 0.69) | <0.001      | 0.83 (0.81, 0.85)                                           |
| Multivariable model <sup>2</sup> | Reference | 0.84 (0.80, 0.88) | 0.76 (0.72, 0.79) | 0.64 (0.61, 0.67) | <0.001      | 0.82 (0.80, 0.84)                                           |
| Multivariable model <sup>3</sup> | Reference | 0.94 (0.89, 0.98) | 0.90 (0.85, 0.95) | 0.86 (0.81, 0.91) | <0.001      | 0.93 (0.91, 0.96)                                           |

AHEI-2010, alternate Healthy Eating Index-2010; AMED, alternate Mediterranean diet; DASH, Dietary Approaches to Stop Hypertension

<sup>1</sup> Adjusted for: age (1 year increment), body mass index ( $<25.0$ ,  $25.0-29.9$ ,  $\geq 30.0$  kg/m<sup>2</sup>), smoking status (never, past, and current 1-14, 15-24, and  $\geq 25$  cigarettes/day), and energy intake (quintiles of kcal/d). All scores are additionally adjusted for alcohol intake (0, 1.0-4.9, 5.0-14.9,  $\geq 15.0$  g/d).

<sup>2</sup> Additionally adjusted for medication use (aspirin, postmenopausal hormone replacement therapy, diuretics,  $\beta$ -blockers, calcium channel blockers, ACE inhibitors, other blood pressure medication, statins and other cholesterol lowering drugs, insulin, oral hypoglycemic medication).

<sup>3</sup> Additionally adjusted for leisure time physical activity (quintiles of METs h/wk).

<sup>4</sup> Standard deviations (SD) of the diet scores: aMED score SD was 2, DASH score SD was 4, AHEI-2010 score SD was 10.



**Supplemental table 7.** Relative risks (95% confidence interval) of frailty according to quartiles of the aMED score among women  $\geq 60$  y in the Nurses' Health Study; lagged analysis.

|                                  | Q1        | Q2                | Q3                | Q4                | P for trend | RR (95%CI) for 1 SD increase in the diet score <sup>4</sup> |
|----------------------------------|-----------|-------------------|-------------------|-------------------|-------------|-------------------------------------------------------------|
| <b>Lagged 6 years</b>            |           |                   |                   |                   |             |                                                             |
| Person-yr                        | 262,995   | 256,622           | 255,236           | 266,071           |             | 1,040,924                                                   |
| Frailty cases                    | 3283      | 3086              | 2777              | 2418              |             | 11,564                                                      |
| Age-adjusted                     | Reference | 0.87 (0.83, 0.91) | 0.75 (0.72, 0.79) | 0.61 (0.58, 0.64) | <0.001      | 0.75 (0.73, 0.77)                                           |
| Multivariable model <sup>1</sup> | Reference | 0.87 (0.83, 0.92) | 0.77 (0.73, 0.81) | 0.64 (0.60, 0.67) | <0.001      | 0.77 (0.75, 0.79)                                           |
| Multivariable model <sup>2</sup> | Reference | 0.86 (0.82, 0.91) | 0.75 (0.72, 0.79) | 0.63 (0.59, 0.66) | <0.001      | 0.76 (0.74, 0.78)                                           |
| Multivariable model <sup>3</sup> | Reference | 0.96 (0.91, 1.01) | 0.91 (0.86, 0.96) | 0.86 (0.81, 0.90) | <0.001      | 0.91 (0.88, 0.94)                                           |
| <b>Lagged 10 years</b>           |           |                   |                   |                   |             |                                                             |
| Person-yr                        | 270,186   | 253,426           | 261,011           | 256,301           |             | 1,040,924                                                   |
| Frailty cases                    | 3131      | 3041              | 2936              | 2456              |             | 11,564                                                      |
| Age-adjusted                     | Reference | 0.89 (0.85, 0.93) | 0.78 (0.74, 0.82) | 0.64 (0.61, 0.68) | <0.001      | 0.78 (0.76, 0.80)                                           |
| Multivariable model <sup>1</sup> | Reference | 0.89 (0.85, 0.94) | 0.79 (0.75, 0.83) | 0.67 (0.63, 0.71) | <0.001      | 0.79 (0.77, 0.82)                                           |
| Multivariable model <sup>2</sup> | Reference | 0.89 (0.85, 0.94) | 0.78 (0.74, 0.82) | 0.66 (0.62, 0.70) | <0.001      | 0.79 (0.76, 0.81)                                           |
| Multivariable model <sup>3</sup> | Reference | 0.98 (0.93, 1.03) | 0.93 (0.88, 0.98) | 0.88 (0.83, 0.93) | <0.001      | 0.92 (0.90, 0.95)                                           |
| <b>Lagged 14 years</b>           |           |                   |                   |                   |             |                                                             |
| Person-yr                        | 244,677   | 305,565           | 241,318           | 249,364           |             | 1,040,924                                                   |
| Frailty cases                    | 2969      | 3217              | 2814              | 2564              |             | 11,564                                                      |
| Age-adjusted                     | Reference | 0.90 (0.86, 0.95) | 0.79 (0.75, 0.83) | 0.67 (0.64, 0.71) | <0.001      | 0.80 (0.78, 0.82)                                           |
| Multivariable model <sup>1</sup> | Reference | 0.91 (0.86, 0.96) | 0.80 (0.76, 0.84) | 0.70 (0.66, 0.74) | <0.001      | 0.82 (0.80, 0.84)                                           |
| Multivariable model <sup>2</sup> | Reference | 0.90 (0.86, 0.95) | 0.79 (0.75, 0.84) | 0.69 (0.65, 0.73) | <0.001      | 0.81 (0.79, 0.83)                                           |
| Multivariable model <sup>3</sup> | Reference | 0.99 (0.94, 1.04) | 0.93 (0.88, 0.98) | 0.90 (0.85, 0.95) | <0.001      | 0.94 (0.91, 0.96)                                           |

AHEI-2010, alternate Healthy Eating Index-2010; AMED, alternate Mediterranean diet; DASH, Dietary Approaches to Stop Hypertension

<sup>1</sup> Adjusted for: age (1 year increment), body mass index (<25.0, 25.0-29.9,  $\geq 30.0$  kg/m<sup>2</sup>), smoking status (never, past, and current 1-14, 15-24, and  $\geq 25$  cigarettes/day), and energy intake (quintiles of kcal/d). The DASH score is additionally adjusted for alcohol intake (0, 1.0-4.9, 5.0-14.9,  $\geq 15.0$  g/d).

<sup>2</sup> Additionally adjusted for medication use (aspirin, postmenopausal hormone replacement therapy, diuretics,  $\beta$ -blockers, calcium channel blockers, ACE inhibitors, other blood pressure medication, statins and other cholesterol lowering drugs, insulin, oral hypoglycemic medication).

<sup>3</sup> Additionally adjusted for leisure time physical activity (quintiles of METs h/wk).

<sup>4</sup> Standard deviations (SD) of the diet scores: aMED score SD was 2, DASH score SD was 4, AHEI-2010 score SD was 10.

**Supplemental table 8.** Relative risks (95% confidence interval) of frailty according to quartiles of the DASH score among women  $\geq 60$  y in the Nurses' Health Study; lagged analysis.

|                                  | Q1        | Q2                | Q3                | Q4                | P for trend | RR (95%CI) for 1 SD increase in the diet score <sup>4</sup> |
|----------------------------------|-----------|-------------------|-------------------|-------------------|-------------|-------------------------------------------------------------|
| <b>Lagged 6 years</b>            |           |                   |                   |                   |             |                                                             |
| Person-yr                        | 258,603   | 259,696           | 263,417           | 259,209           |             | 1,040,924                                                   |
| Frailty cases                    | 3029      | 2970              | 2893              | 2672              |             | 11,564                                                      |
| Age-adjusted                     | Reference | 0.86 (0.81, 0.90) | 0.75 (0.71, 0.79) | 0.62 (0.59, 0.66) | <0.001      | 0.82 (0.80, 0.84)                                           |
| Multivariable model <sup>1</sup> | Reference | 0.88 (0.84, 0.93) | 0.78 (0.74, 0.83) | 0.67 (0.64, 0.71) | <0.001      | 0.85 (0.83, 0.86)                                           |
| Multivariable model <sup>2</sup> | Reference | 0.87 (0.83, 0.91) | 0.77 (0.73, 0.81) | 0.66 (0.62, 0.70) | <0.001      | 0.84 (0.82, 0.86)                                           |
| Multivariable model <sup>3</sup> | Reference | 0.96 (0.91, 1.01) | 0.93 (0.88, 0.98) | 0.90 (0.85, 0.95) | <0.001      | 0.95 (0.93, 0.97)                                           |
| <b>Lagged 10 years</b>           |           |                   |                   |                   |             |                                                             |
| Person-yr                        | 259,004   | 262,840           | 259,802           | 259,278           |             | 1,040,924                                                   |
| Frailty cases                    | 2912      | 3028              | 2857              | 2767              |             | 11,564                                                      |
| Age-adjusted                     | Reference | 0.89 (0.85, 0.94) | 0.77 (0.73, 0.81) | 0.66 (0.62, 0.69) | <0.001      | 0.84 (0.82, 0.85)                                           |
| Multivariable model <sup>1</sup> | Reference | 0.92 (0.87, 0.97) | 0.80 (0.76, 0.84) | 0.71 (0.67, 0.75) | <0.001      | 0.86 (0.84, 0.88)                                           |
| Multivariable model <sup>2</sup> | Reference | 0.91 (0.86, 0.96) | 0.79 (0.75, 0.83) | 0.70 (0.66, 0.74) | <0.001      | 0.86 (0.84, 0.87)                                           |
| Multivariable model <sup>3</sup> | Reference | 1.00 (0.95, 1.05) | 0.94 (0.89, 0.99) | 0.93 (0.88, 0.98) | 0.002       | 0.96 (0.94, 0.98)                                           |
| <b>Lagged 14 years</b>           |           |                   |                   |                   |             |                                                             |
| Person-yr                        | 256,167   | 270,820           | 257,919           | 256,018           |             | 1,040,924                                                   |
| Frailty cases                    | 2838      | 3025              | 2871              | 2830              |             | 11,564                                                      |
| Age-adjusted                     | Reference | 0.89 (0.85, 0.94) | 0.78 (0.74, 0.82) | 0.67 (0.64, 0.71) | <0.001      | 0.85 (0.83, 0.86)                                           |
| Multivariable model <sup>1</sup> | Reference | 0.92 (0.88, 0.97) | 0.81 (0.77, 0.85) | 0.72 (0.68, 0.76) | <0.001      | 0.87 (0.86, 0.89)                                           |
| Multivariable model <sup>2</sup> | Reference | 0.92 (0.87, 0.96) | 0.80 (0.76, 0.84) | 0.71 (0.68, 0.75) | <0.001      | 0.87 (0.85, 0.89)                                           |
| Multivariable model <sup>3</sup> | Reference | 1.01 (0.96, 1.06) | 0.95 (0.90, 1.00) | 0.94 (0.89, 0.99) | 0.005       | 0.97 (0.95, 0.99)                                           |

AHEI-2010, alternate Healthy Eating Index-2010; AMED, alternate Mediterranean diet; DASH, Dietary Approaches to Stop Hypertension

<sup>1</sup> Adjusted for: age (1 year increment), body mass index (<25.0, 25.0-29.9,  $\geq 30.0$  kg/m<sup>2</sup>), smoking status (never, past, and current 1-14, 15-24, and  $\geq 25$  cigarettes/day), and energy intake (quintiles of kcal/d). The DASH score is additionally adjusted for alcohol intake (0, 1.0-4.9, 5.0-14.9,  $\geq 15.0$  g/d).

<sup>2</sup> Additionally adjusted for medication use (aspirin, postmenopausal hormone replacement therapy, diuretics,  $\beta$ -blockers, calcium channel blockers, ACE inhibitors, other blood pressure medication, statins and other cholesterol lowering drugs, insulin, oral hypoglycemic medication).

<sup>3</sup> Additionally adjusted for leisure time physical activity (quintiles of METs h/wk).

<sup>4</sup> Standard deviations (SD) of the diet scores: aMED score SD was 2, DASH score SD was 4, AHEI-2010 score SD was 10.

**Supplemental table 9.** Relative risks (95% confidence interval) of frailty according to quartiles of the AHEI-2010 score among women  $\geq 60$ y in the Nurses' Health Study; lagged analysis.

|                                  | Q1        | Q2                | Q3                | Q4                | P for trend | RR (95%CI) for 1 SD increase in the diet score <sup>4</sup> |
|----------------------------------|-----------|-------------------|-------------------|-------------------|-------------|-------------------------------------------------------------|
| <b>Lagged 6 years</b>            |           |                   |                   |                   |             |                                                             |
| Person-yr                        | 259,005   | 259,705           | 260,711           | 261,504           |             | 1,040,924                                                   |
| Frailty cases                    | 3326      | 3101              | 2767              | 2370              |             | 11,564                                                      |
| Age-adjusted                     | Reference | 0.86 (0.82, 0.90) | 0.74 (0.70, 0.78) | 0.60 (0.56, 0.63) | <0.001      | 0.80 (0.78, 0.82)                                           |
| Multivariable model <sup>1</sup> | Reference | 0.87 (0.83, 0.91) | 0.75 (0.71, 0.79) | 0.63 (0.60, 0.67) | <0.001      | 0.82 (0.80, 0.84)                                           |
| Multivariable model <sup>2</sup> | Reference | 0.87 (0.83, 0.91) | 0.76 (0.72, 0.79) | 0.64 (0.61, 0.68) | <0.001      | 0.82 (0.81, 0.84)                                           |
| Multivariable model <sup>3</sup> | Reference | 0.96 (0.91, 1.01) | 0.89 (0.84, 0.94) | 0.85 (0.80, 0.90) | <0.001      | 0.93 (0.91, 0.95)                                           |
| <b>Lagged 10 years</b>           |           |                   |                   |                   |             |                                                             |
| Person-yr                        | 259,334   | 259,778           | 260,674           | 261,138           |             | 1,040,924                                                   |
| Frailty cases                    | 3216      | 3073              | 2791              | 2484              |             | 11,564                                                      |
| Age-adjusted                     | Reference | 0.87 (0.83, 0.92) | 0.75 (0.71, 0.79) | 0.62 (0.59, 0.66) | <0.001      | 0.82 (0.80, 0.84)                                           |
| Multivariable model <sup>1</sup> | Reference | 0.87 (0.83, 0.92) | 0.76 (0.72, 0.80) | 0.66 (0.62, 0.69) | <0.001      | 0.84 (0.82, 0.85)                                           |
| Multivariable model <sup>2</sup> | Reference | 0.88 (0.84, 0.92) | 0.77 (0.73, 0.81) | 0.67 (0.63, 0.70) | <0.001      | 0.84 (0.83, 0.86)                                           |
| Multivariable model <sup>3</sup> | Reference | 0.97 (0.92, 1.02) | 0.89 (0.85, 0.94) | 0.86 (0.82, 0.91) | <0.001      | 0.94 (0.92, 0.96)                                           |
| <b>Lagged 14 years</b>           |           |                   |                   |                   |             |                                                             |
| Person-yr                        | 259,741   | 259,893           | 260,497           | 260,794           |             | 1,040,924                                                   |
| Frailty cases                    | 3104      | 3079              | 2754              | 2627              |             | 11,564                                                      |
| Age-adjusted                     | Reference | 0.90 (0.85, 0.94) | 0.75 (0.71, 0.79) | 0.66 (0.63, 0.70) | <0.001      | 0.84 (0.82, 0.86)                                           |
| Multivariable model <sup>1</sup> | Reference | 0.90 (0.85, 0.94) | 0.76 (0.72, 0.80) | 0.69 (0.66, 0.73) | <0.001      | 0.86 (0.84, 0.87)                                           |
| Multivariable model <sup>2</sup> | Reference | 0.91 (0.86, 0.96) | 0.77 (0.73, 0.81) | 0.71 (0.67, 0.75) | <0.001      | 0.86 (0.85, 0.88)                                           |
| Multivariable model <sup>3</sup> | Reference | 0.99 (0.95, 1.05) | 0.89 (0.84, 0.93) | 0.90 (0.85, 0.94) | <0.001      | 0.95 (0.93, 0.97)                                           |

AHEI-2010, alternate Healthy Eating Index-2010; AMED, alternate Mediterranean diet; DASH, Dietary Approaches to Stop Hypertension

<sup>1</sup> Adjusted for: age (1 year increment), body mass index (<25.0, 25.0-29.9,  $\geq 30.0$  kg/m<sup>2</sup>), smoking status (never, past, and current 1-14, 15-24, and  $\geq 25$  cigarettes/day), and energy intake (quintiles of kcal/d). The DASH score is additionally adjusted for alcohol intake (0, 1.0-4.9, 5.0-14.9,  $\geq 15.0$  g/d).

<sup>2</sup> Additionally adjusted for medication use (aspirin, postmenopausal hormone replacement therapy, diuretics,  $\beta$ -blockers, calcium channel blockers, ACE inhibitors, other blood pressure medication, statins and other cholesterol lowering drugs, insulin, oral hypoglycemic medication).

<sup>3</sup> Additionally adjusted for leisure time physical activity (quintiles of METs h/wk).

<sup>4</sup> Standard deviations (SD) of the diet scores: aMED score SD was 2, DASH score SD was 4, AHEI-2010 score SD was 10.

**Supplemental table 10.** Relative risks (95% confidence interval) of frailty according to quartiles of the diet quality scores among a women  $\geq 60$ y without diabetes, heart disease or cancer in the Nurses' Health Study.

|                                  | Q1        | Q2                | Q3                | Q4                | P for trend | RR (95%CI) for 1 SD increase in the diet score <sup>4</sup> |
|----------------------------------|-----------|-------------------|-------------------|-------------------|-------------|-------------------------------------------------------------|
| <b>aMED</b>                      |           |                   |                   |                   |             |                                                             |
| Participants, n                  | 14,659    | 17,782            | 13,492            | 15,181            |             | 61,114                                                      |
| Person-yr                        | 199,510   | 215,042           | 200,470           | 214,892           |             | 829,913                                                     |
| Frailty cases                    | 2373      | 2036              | 1697              | 1308              |             | 7414                                                        |
| Age-adjusted                     | Reference | 0.82 (0.77, 0.87) | 0.68 (0.64, 0.72) | 0.51 (0.48, 0.55) | <0.001      | 0.71 (0.69, 0.73)                                           |
| Multivariable model <sup>1</sup> | Reference | 0.82 (0.78, 0.88) | 0.70 (0.65, 0.74) | 0.53 (0.49, 0.57) | <0.001      | 0.72 (0.70, 0.75)                                           |
| Multivariable model <sup>2</sup> | Reference | 0.82 (0.77, 0.87) | 0.69 (0.65, 0.74) | 0.52 (0.49, 0.56) | <0.001      | 0.72 (0.69, 0.74)                                           |
| Multivariable model <sup>3</sup> | Reference | 0.92 (0.87, 0.98) | 0.85 (0.80, 0.90) | 0.75 (0.69, 0.80) | <0.001      | 0.86 (0.83, 0.89)                                           |
| <b>DASH</b>                      |           |                   |                   |                   |             |                                                             |
| Participants, n                  | 17,160    | 16,923            | 14,289            | 12,742            |             | 61,114                                                      |
| Person-yr                        | 203,964   | 212,885           | 208,517           | 204,547           |             | 829,913                                                     |
| Frailty cases                    | 2164      | 1902              | 1880              | 1468              |             | 7414                                                        |
| Age-adjusted                     | Reference | 0.79 (0.74, 0.83) | 0.71 (0.67, 0.76) | 0.53 (0.49, 0.56) | <0.001      | 0.78 (0.77, 0.80)                                           |
| Multivariable model <sup>1</sup> | Reference | 0.81 (0.76, 0.86) | 0.76 (0.71, 0.80) | 0.58 (0.54, 0.62) | <0.001      | 0.81 (0.79, 0.83)                                           |
| Multivariable model <sup>2</sup> | Reference | 0.80 (0.75, 0.85) | 0.75 (0.70, 0.80) | 0.57 (0.53, 0.61) | <0.001      | 0.81 (0.79, 0.83)                                           |
| Multivariable model <sup>3</sup> | Reference | 0.90 (0.85, 0.96) | 0.92 (0.86, 0.98) | 0.79 (0.74, 0.85) | <0.001      | 0.92 (0.90, 0.95)                                           |
| <b>AHEI-2010</b>                 |           |                   |                   |                   |             |                                                             |
| Participants, n                  | 16,405    | 15,448            | 14,933            | 14,328            |             | 61,114                                                      |
| Person-yr                        | 205,823   | 207,216           | 207,853           | 209,022           |             | 829,913                                                     |
| Frailty cases                    | 2352      | 2002              | 1765              | 1295              |             | 7414                                                        |
| Age-adjusted                     | Reference | 0.81 (0.76, 0.86) | 0.71 (0.66, 0.75) | 0.51 (0.47, 0.54) | <0.001      | 0.76 (0.74, 0.78)                                           |
| Multivariable model <sup>1</sup> | Reference | 0.82 (0.78, 0.87) | 0.72 (0.68, 0.77) | 0.54 (0.51, 0.58) | <0.001      | 0.78 (0.76, 0.80)                                           |
| Multivariable model <sup>2</sup> | Reference | 0.82 (0.77, 0.87) | 0.72 (0.68, 0.77) | 0.54 (0.51, 0.58) | <0.001      | 0.78 (0.76, 0.80)                                           |
| Multivariable model <sup>3</sup> | Reference | 0.92 (0.86, 0.97) | 0.88 (0.82, 0.93) | 0.75 (0.70, 0.80) | <0.001      | 0.89 (0.87, 0.92)                                           |

AHEI-2010, alternate Healthy Eating Index-2010; AMED, alternate Mediterranean diet; DASH, Dietary Approaches to Stop Hypertension

<sup>1</sup> Adjusted for: age (1 year increment), body mass index (<25.0, 25.0-29.9,  $\geq 30.0$  kg/m<sup>2</sup>), smoking status (never, past, and current 1-14, 15-24, and  $\geq 25$  cigarettes/day), and energy intake (quintiles of kcal/d). The DASH score is additionally adjusted for alcohol intake (0, 1.0-4.9, 5.0-14.9,  $\geq 15.0$  g/d).

<sup>2</sup> Additionally adjusted for medication use (aspirin, postmenopausal hormone replacement therapy, diuretics,  $\beta$ -blockers, calcium channel blockers, ACE inhibitors, other blood pressure medication, statins and other cholesterol lowering drugs, insulin, oral hypoglycemic medication).

<sup>3</sup> Additionally adjusted for leisure time physical activity (quintiles of METs h/wk).

<sup>4</sup> Standard deviations (SD) of the diet scores: aMED score SD was 2, DASH score SD was 4, AHEI-2010 score SD was 10.

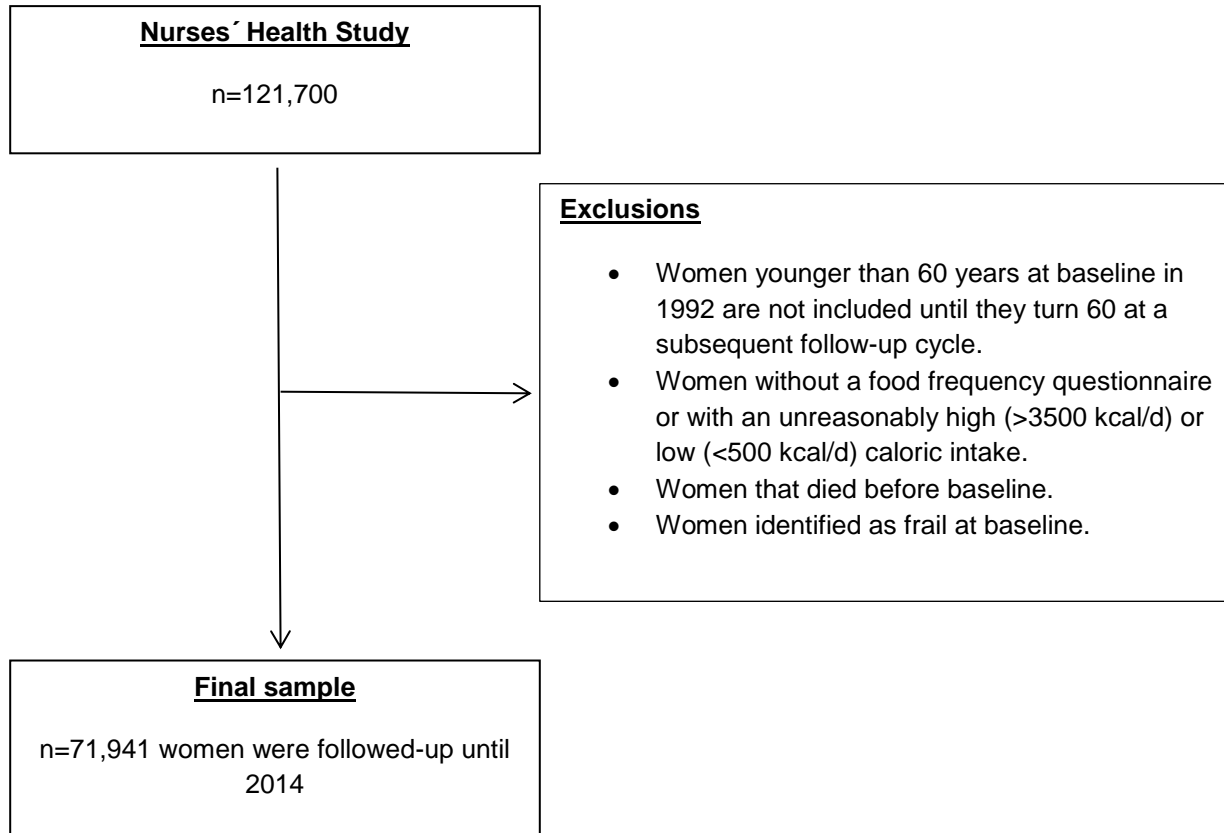

**Supplemental figure 1.** Participant flow chart
